# Supplementary material for: Pharmacists’ role in harm reduction: a survey assessment of Kentucky community pharmacists’ willingness to participate in syringe/needle exchange
Source: PubMed Central journal article supplement (PMC5785823; doi:10.1186/s12954-018-0211-4), 2018-01-25
Supplement: 12954_2018_211_MOESM1_ESM.pdf [file 12954_2018_211_MOESM1_ESM.pdf]

# Pharmacists' Role in Opioid Overdose Prevention

Please complete the survey below.

Thank you!

---

---

## COVER LETTER FOR SURVEY

**TITLE OF STUDY: Pharmacists' Role in Opioid Overdose Prevention**

**INVESTIGATOR INFORMATION: Patricia Freeman, PhD Phone: 859-323-1381**

**You are invited to participate in a survey collecting information and opinions related to the pharmacists role in opioid overdose prevention being conducted by the Center for the Advancement of Pharmacy Practice at the University of Kentucky College of Pharmacy in collaboration with the Kentucky Board of Pharmacy.**

**You have been asked to participate in this survey because you are a pharmacist licensed to practice in Kentucky. If you voluntarily complete the survey, you will be one of approximately 4500 pharmacists to do so. The survey will take approximately 10 minutes to complete.**

**The survey asks about your knowledge of opioid overdose and use of naloxone for overdose prevention, your opinions of the pharmacist's role in overdose prevention, and general demographic information. The information generated from this research will assist with the development of programs designed to assist pharmacists in implementing naloxone dispensing and opioid overdose prevention programs.**

**Your response to the survey is anonymous. Neither the researchers nor the Board of Pharmacy will know who did, or did not, respond to the survey. The research team will not attempt to trace responses back to individuals. There are no known risks associated with disclosure of your opinions about opioid overdose prevention programs.**

**Please be aware, while we make every effort to safeguard your data once received on our servers via REDCap, given the nature of online surveys, as with anything involving the Internet, we can never guarantee the confidentiality of the data while still en route to us.**

**You may receive two additional email invitations to participate in this survey over the next two weeks if you did not initially respond to the survey. If you elect not to respond to the survey, please ignore these additional emails.**

**Taking part in this research is completely voluntary. If you choose not to participate, there will be no penalty to you. You are free to skip any question that you do not want to answer and you can discontinue the survey at any time. Although you will not personally benefit by completing the survey the information that you provide may help with the implementation of opioid overdose prevention programs by pharmacists.**

**This study has been reviewed by the University of Kentucky Medical Institutional Review Board. If you have questions about this study, you may call Patricia Freeman at 859-323-1381. If you have any questions about your rights as a volunteer in this research, you may contact the staff in the Office of Research Integrity at the University of Kentucky at 859-257-9428 or toll free at 1-866-400-9428.**

**Thank you for your time and we appreciate your consideration in completing this survey.**

**Sincerely,**

**Patricia Freeman, PhD  
Associate Professor  
University of Kentucky College of Pharmacy**

Do you currently practice pharmacy in the Commonwealth of Kentucky?

- Yes  
 No

Thank you for your time and interest. The survey is designed for pharmacists who currently practice in Kentucky.

---

---

**Section I: Pharmacist Characteristics**

- My age in years is:
- 21-25
  - 26-34
  - 35-44
  - 45-64
  - 65+
- My terminal degree is:
- BSP Pharm
  - PharmD
  - MSP Pharm
  - PhD
  - Other terminal degree (please describe):
- Please describe: \_\_\_\_\_
- My gender is:
- Male
  - Female
  - Prefer not to answer
- My total number of years in practice, including residency:
- 0-2 years
  - 3-5 years
  - 6-10 years
  - 11-20 years
  - greater than 20 years
- The practice setting where I spend most of my time practicing is best described as:
- Independent community pharmacy
  - Chain community pharmacy
  - Supermarket/mass merchandiser pharmacy
  - Hospital pharmacy
  - Ambulatory clinic
  - Long-term care pharmacy
  - Other, please describe
- What type of hospital pharmacy?
- Inpatient
  - Outpatient
- Do you provide emergency department pharmacy services?
- Yes
  - No
- Do you dispense from your clinic?
- Yes
  - No
- Do you provide long-term care dispensing services?
- Yes
  - No
- Please describe: \_\_\_\_\_
- What are the number of hours you work in a pharmacy per week on average?
- less than 8 hours
  - 8-23 hours
  - 24-36 hours
  - greater than 36 hours

What is the Kentucky county where you currently practice? (If you practice in more than one county, select the county where you practice most often.)

- Adair
- Allen
- Anderson
- Ballard
- Barren
- Bath
- Bell
- Boone
- Bourbon
- Boyd
- Boyle
- Bracken
- Breathitt
- Breckenridge
- Bullitt
- Butler
- Caldwell
- Calloway
- Campbell
- Carlisle
- Carroll
- Carter
- Casey
- Christian
- Clark
- Clay
- Clinton
- Crittenden
- Cumberland
- Daviess
- Edmonson
- Elliot
- Estill
- Fayette
- Fleming
- Floyd
- Franklin
- Fulton
- Gallatin
- Garrard
- Grant
- Graves
- Grayson
- Green
- Greenup
- Hancock
- Hardin
- Harlan
- Harrison
- Hart
- Henderson
- Henry
- Hickman
- Hopkins
- Jackson
- Jefferson
- Jessamine
- Johnson
- Kenton
- Knott
- Knox
- Larue
- Laurel
- Lawrence
- Lee
- Leslie
- Letcher
- Lewis
- Lincoln
- Livingston

- Logan
- Lyon
- Madison
- Magoffin
- Marion
- Marshall
- Martin
- Mason
- McLean
- McCracken
- McCreary
- Meade
- Menifee
- Mercer
- Metcalfe
- Monroe
- Montgomery
- Morgan
- Muhlenberg
- Nelson
- Nicholas
- Ohio
- Oldham
- Owen
- Owsley
- Pendleton
- Perry
- Pike
- Powell
- Pulaski
- Robertson
- Rockcastle
- Rowan
- Russell
- Scott
- Shelby
- Simpson
- Spencer
- Taylor
- Todd
- Trigg
- Trimble
- Union
- Warren
- Washington
- Wayne
- Webster
- Whitley
- Wolfe
- Woodford

What is the zip code of the Kentucky address where you currently practice? (If you practice at more than one address, select the zip code where you practice most often.)

\_\_\_\_\_

(Zip code)

---



---

## Section II: Opioid Overdose Prevention

How many times have you ever responded to an incident of respiratory depression caused by (or suspected to be caused by) opioids?

\_\_\_\_\_ (enter number above)

Where were you when you responded to an incident of respiratory depression? (check all that apply)

- In a community setting  
 In a hospital setting  
 In a pharmacy setting  
 In a school setting  
 Other, please describe

Please describe:

\_\_\_\_\_

Have you ever administered naloxone to a person experiencing respiratory depression caused by (or suspected to be caused by) opioids?

- Yes  
 No

Have you ever dispensed naloxone for an individual to take home and use for opioid overdose prevention?

- Yes  
 No

In which of the following situations have you dispensed naloxone for an individual to take home and use for opioid overdose prevention? (Check all that apply.)

- An individual with a history of opioid overdose  
 An individual who had a high dose opioid prescription (>100mg equivalents morphine daily)  
 An individual who was opioid naïve and received a methadone prescription  
 An individual who received an opioid prescription but had a history of smoking, COPD, respiratory illness or obstruction  
 An individual who received an opioid prescription but had a history of renal dysfunction or hepatic disease  
 An individual who had a concurrent benzodiazepine prescription  
 An individual who had known or suspected alcohol abuse  
 Other (please specify)  
 None of these  
 I don't know

Please specify

\_\_\_\_\_

What percent of patients to whom you dispensed naloxone did you provide education on the use of naloxone for overdose prevention?

- 10 percent  
 25 percent  
 50 percent  
 More than 50 percent  
 I provided no patient education  
 I don't know

What percent of patients to whom you dispensed naloxone had already received education elsewhere on overdose prevention and naloxone use (i.e., from a prescriber, clinic, community organization or family member)?

- 10 percent  
 25 percent  
 50 percent  
 More than 50 percent  
 I don't know

How many times have you dispensed naloxone to an individual in the past 30 days?

\_\_\_\_\_ (enter number above)

---



---

**Section III: Naloxone Access Programs**

Have you ever been trained in overdose prevention and naloxone administration?

- Yes  
 No

What was the name of the training program you attended?

\_\_\_\_\_

Do you plan to apply for certification in Kentucky to initiate the dispensing of naloxone via a prescriber-approved protocol?

- Yes  
 No

When do you plan to apply for certification?

- I have already applied for certification  
 I will apply in the next 6 months  
 I will apply within 6-12 months  
 I will apply in 1-2 years  
 I am not sure

How CONFIDENT are you in your ability to:

|                                                                                                                        | 1 Not at all<br>confident | 2                     | 3                     | 4                     | 5                     | 6<br>Extremely<br>confident | Don't know            |
|------------------------------------------------------------------------------------------------------------------------|---------------------------|-----------------------|-----------------------|-----------------------|-----------------------|-----------------------------|-----------------------|
| Identify signs and symptoms of opioid overdose                                                                         | <input type="radio"/>     | <input type="radio"/> | <input type="radio"/> | <input type="radio"/> | <input type="radio"/> | <input type="radio"/>       | <input type="radio"/> |
| Proactively identify individuals who may be at risk for opioid overdose and would benefit from a naloxone prescription | <input type="radio"/>     | <input type="radio"/> | <input type="radio"/> | <input type="radio"/> | <input type="radio"/> | <input type="radio"/>       | <input type="radio"/> |
| Educate patients to recognize opioid overdose and safely administer naloxone when indicated                            | <input type="radio"/>     | <input type="radio"/> | <input type="radio"/> | <input type="radio"/> | <input type="radio"/> | <input type="radio"/>       | <input type="radio"/> |

How WILLING are you to:

|                                                                                                    | 1 Not willing at all             | 2                     | 3                     | 4                     | 5                     | 6 Very much willing   | Don't know            |
|----------------------------------------------------------------------------------------------------|----------------------------------|-----------------------|-----------------------|-----------------------|-----------------------|-----------------------|-----------------------|
| Attend an education and training program on opioid overdose prevention                             | <input checked="" type="radio"/> | <input type="radio"/> | <input type="radio"/> | <input type="radio"/> | <input type="radio"/> | <input type="radio"/> | <input type="radio"/> |
| Enter into a protocol agreement with a physician authorizing the initiation of naloxone dispensing | <input type="radio"/>            | <input type="radio"/> | <input type="radio"/> | <input type="radio"/> | <input type="radio"/> | <input type="radio"/> | <input type="radio"/> |
| Proactively identify individuals meeting criteria for naloxone dispensation under a protocol       | <input type="radio"/>            | <input type="radio"/> | <input type="radio"/> | <input type="radio"/> | <input type="radio"/> | <input type="radio"/> | <input type="radio"/> |
| Initiate the dispensing of naloxone under a protocol agreement with a physician                    | <input type="radio"/>            | <input type="radio"/> | <input type="radio"/> | <input type="radio"/> | <input type="radio"/> | <input type="radio"/> | <input type="radio"/> |
| Dispense naloxone for opioid overdose prevention with a valid prescription                         | <input type="radio"/>            | <input type="radio"/> | <input type="radio"/> | <input type="radio"/> | <input type="radio"/> | <input type="radio"/> | <input type="radio"/> |
| Educate patients to recognize opioid overdose and safely administer naloxone when indicated        | <input type="radio"/>            | <input type="radio"/> | <input type="radio"/> | <input type="radio"/> | <input type="radio"/> | <input type="radio"/> | <input type="radio"/> |

Which of the following are barriers that you foresee in implementing a naloxone access program at your practice? (Check all that apply)

- Time to develop and implement program
- Support from manager or administration for program
- Knowledge regarding the law and regulations authorizing naloxone access programs
- Complications with billing and reimbursement
- Moral or ethical concerns associated with drug abuse and overdose
- Concerns over clientele that might frequent the pharmacy if a program were in place
- Packaging or stocking the various forms of naloxone
- Community opposition to a local naloxone access program
- Other barriers
- None of these are barriers

Please describe

\_\_\_\_\_

Which of the barriers you selected above represents the most significant challenge to implementing a naloxone access program at your practice?

- Time to develop and implement program
- Support from manager or administration for program
- Knowledge regarding the law and regulations authorizing access programs
- Complications with billing and reimbursement
- Moral or ethical concerns associated with drug abuse and overdose
- Concerns over clientele that might frequent the pharmacy if a program were in place
- Packaging or stocking the various forms of naloxone
- Community opposition to a local naloxone access program
- Other barrier as listed above



---



---

**Section IV: Attitudes Toward Overdose Prevention**

Below are a series of statements. Please choose the number corresponding to your agreement with each statement. There are no right or wrong answers. We are interested in hearing your opinions about these statements.

|                                                                                                                   | 1 Strongly disagree   | 2                     | 3                     | 4                     | 5                     | 6 Strongly agree      | Don't know            |
|-------------------------------------------------------------------------------------------------------------------|-----------------------|-----------------------|-----------------------|-----------------------|-----------------------|-----------------------|-----------------------|
| Overdose prevention for people who use opioids is a waste of time and money                                       | <input type="radio"/> | <input type="radio"/> | <input type="radio"/> | <input type="radio"/> | <input type="radio"/> | <input type="radio"/> | <input type="radio"/> |
| Training people how to identify and respond to an overdose sends the message that misusing pain medications is OK | <input type="radio"/> | <input type="radio"/> | <input type="radio"/> | <input type="radio"/> | <input type="radio"/> | <input type="radio"/> | <input type="radio"/> |
| Pharmacists have a role to play in injury prevention, including overdose prevention                               | <input type="radio"/> | <input type="radio"/> | <input type="radio"/> | <input type="radio"/> | <input type="radio"/> | <input type="radio"/> | <input type="radio"/> |
| Overdose prevention programs encourage misuse of opioids                                                          | <input type="radio"/> | <input type="radio"/> | <input type="radio"/> | <input type="radio"/> | <input type="radio"/> | <input type="radio"/> | <input type="radio"/> |

Please indicate whether this sentence is true, false or don't know: Good Samaritan laws shield individuals who call 911 to help someone experiencing an overdose from being charged or prosecuted with possession of narcotics or controlled substances (including pain medication) if these substances are found at the scene of the event.

- True  
 False  
 Don't know

Please indicate whether this sentence is true, false or don't know: Kentucky currently has a Good Samaritan law as described above.

- True  
 False  
 Don't know

## Section V: Syringe and Needle Access

Do you sell syringes and needles without a prescription at your pharmacy?

- Yes  
 No

In the last 30 days, to how many individuals have you sold syringes and needles?

\_\_\_\_\_ (enter number here)

In the past 30 days, how many times have you denied requests for purchase of syringes or needles?

\_\_\_\_\_ (enter number here)

Why did you deny a request for the purchase of the syringes or needles?

\_\_\_\_\_

In the past 30 days, how many requests for syringes or needles have you denied?

\_\_\_\_\_ (enter number above)

What are the barriers to selling syringes or needles without a prescription at your pharmacy?

\_\_\_\_\_

Below are a series of statements. Please choose the number corresponding to your agreement with each statement. There are no right or wrong answers. We are interested in hearing your opinions about these statements.

To what extent do you AGREE with following statements:

|                                                                                                                                        | 1 Strongly disagree   | 2                     | 3                     | 4                     | 5                     | 6 Strongly agree      | Don't know            |
|----------------------------------------------------------------------------------------------------------------------------------------|-----------------------|-----------------------|-----------------------|-----------------------|-----------------------|-----------------------|-----------------------|
| Access to clean syringes and needles is important to prevent blood-borne infections such as HIV and hepatitis in injection drug users. | <input type="radio"/> | <input type="radio"/> | <input type="radio"/> | <input type="radio"/> | <input type="radio"/> | <input type="radio"/> | <input type="radio"/> |
| Pharmacists could have a significant public health impact by providing access to syringes and needles for injection drug users.        | <input type="radio"/> | <input type="radio"/> | <input type="radio"/> | <input type="radio"/> | <input type="radio"/> | <input type="radio"/> | <input type="radio"/> |

Assuming state law allowed it and mechanisms for reimbursement were in place, how willing would you be to:

|                                                                              | 1 Not willing at all  | 2                     | 3                     | 4                     | 5                     | 6 Very much willing   | Don't know            |
|------------------------------------------------------------------------------|-----------------------|-----------------------|-----------------------|-----------------------|-----------------------|-----------------------|-----------------------|
| Provide clean syringes and needles to injection drug users upon request?     | <input type="radio"/> | <input type="radio"/> | <input type="radio"/> | <input type="radio"/> | <input type="radio"/> | <input type="radio"/> | <input type="radio"/> |
| Dispose of used syringes and needles from injection drug users upon request? | <input type="radio"/> | <input type="radio"/> | <input type="radio"/> | <input type="radio"/> | <input type="radio"/> | <input type="radio"/> | <input type="radio"/> |

We welcome any comments or feedback from you.

\_\_\_\_\_
